1 **Affective Bias as a Rational Response to the Statistics of Rewards and Punishments**

2 Erdem Pulcu PhD<sup>1</sup> and Michael Browning MB.BS, DPhil<sup>1,2\*</sup>

3

4

5

6

7

8

9

10

11

12 <sup>1</sup> Department of Psychiatry, University of Oxford

13 <sup>2</sup> Oxford Health NHS Trust, Oxford

14 \*Corresponding Author:

15 Michael Browning, Dept. of Psychiatry, Warneford Hosptial, Oxford, OX3 7JX.

16 Tel: +441865 223635

17 Fax: +441865 251076

18 michael.browning@psych.ox.ac.uk

19

20 Keywords: depression; learning; computational modelling; norepinephrine; pupilometry

21

Word Count:

Abstract: 150

Main Text (excluding methods): 2832

Figures: 4, Tables: 1

Supplementary Information: 1 File (including 6 Supplementary Figures and 1 Table)

22 **Abstract**

23 **Affective bias, the tendency to prioritise the processing of negative relative to positive events, is**  
24 **causally linked to clinical depression. However, why such biases develop or how they may best be**  
25 **ameliorated is not known. Using a computational framework, we investigated whether affective**  
26 **biases may reflect an individual's estimates of the information content of negative and positive**  
27 **events. During a reinforcement learning task, the information content of positive and negative**  
28 **outcomes was manipulated independently by varying the volatility of their occurrence. Human**  
29 **participants altered the learning rates used for the outcomes selectively, preferentially learning**  
30 **from the most informative. This behaviour was associated with activity of the central**  
31 **norepinephrine system, estimated using pupillometry, for loss outcomes. Humans maintain**  
32 **independent estimates of the information content of positive and negative outcomes which bias**  
33 **their processing of affective events. Normalising affective biases using computationally inspired**  
34 **interventions may represent a novel treatment approach for depression.**

35

36

37

38

## 39 Introduction

40 When learning about and interacting with the world, individuals vary in the extent to which their  
41 beliefs and behaviours are influenced by the events they experience. Often this variation displays an  
42 affective gradient with some individuals being more influenced by positive and others by negative  
43 events. For example, many people display an optimism bias, updating their beliefs to a greater  
44 extent following positive than negative outcomes (Sharot & Garrett, 2016). The opposite effect, a  
45 tendency to be more influenced by negative events, has been argued to cause illnesses such as  
46 depression (Mathews & MacLeod, 2005). Negative affective biases in depression have been reported  
47 using measures of attention (Gotlib, Krasnoperova, Yue, & Joormann, 2004), memory (Bradley, Mogg,  
48 & Williams, 1995; Nelson & Craighead, 1977) and learning (Eshel & Roiser, 2010). Consistent with  
49 their causal role in depression, interventions designed to target and reduce negative biases, such as  
50 cognitive behavioural therapy or more specific bias modification procedures can lead to  
51 improvement in symptoms (Browning, Holmes, Charles, Cowen, & Harmer, 2012; NICE, 2009).  
52 However, relatively little work has explored why individuals might develop negative biases in the  
53 first place. This question is of particular importance as understanding the mechanisms which lead to  
54 the development of affective bias is an essential first step in the development of novel treatments  
55 designed to alter this process and thus reduce symptoms of depression. One way of answering *why*  
56 individuals develop negative bias is to consider *when* negative biases might be the appropriate way  
57 to think about the world. In this study we draw on recent advances from the computational  
58 neuroscience of learning to investigate whether affective biases may be understood in terms of how  
59 informative an individual judges an event to be. Below we describe the conceptual framework of this  
60 proposal and then link this to the causal cognitive processes which underlie depression.  
61 Recent computational work has demonstrated that individuals' expectations are influenced more by  
62 those events which carry more information; that is, those events which improve predictions of  
63 future outcomes to a greater degree (T. E. J. Behrens, Woolrich, Walton, & Rushworth, 2007;

64 Browning, Behrens, Jocham, O'Reilly, & Bishop, 2015; MacKay, 2003; Nassar et al., 2012). One factor  
65 which influences how informative an event is the changeability, or volatility, of the underlying  
66 association which is being learned. For example, imagine trying to learn what your colleagues think  
67 about your performance at work, based solely on their day-to-day feedback. One colleague seems to  
68 have a stable positive view of you, complimenting you on your work on 80% of the occasions you  
69 meet and never increasing or decreasing this frequency. In this case, each particular event (being  
70 complimented or not) provides little new information about what your colleague thinks about you,  
71 as you will always have an 80% chance of being complimented the next time you meet. In contrast, a  
72 second colleague's appraisal of you seems to be more changeable, with periods when they think  
73 highly of you and compliment you regularly and others when they rarely compliment you at all. In  
74 this case each event provides more information; if you have recently been complimented by this  
75 colleague it is more likely that their opinion of you is currently high and they will compliment you the  
76 next time you meet (Figure 1B). When learning what your colleagues currently think about you, you  
77 should be more influenced by whether the second, more volatile, colleague compliments you or not,  
78 because this provides more useful information than the behaviour of the stable colleague.

79 Within a reinforcement learning framework, the influence of events on one's belief is captured by  
80 the learning rate parameter, with a higher learning rate reflecting a greater influence of more  
81 recently experienced events (Sutton & Barto, 1998). Humans adjust their learning rate precisely as  
82 described above, using a higher learning rate for events, such as those occurring in a volatile context,  
83 which they estimate to be more informative (T. E. J. Behrens et al., 2007; Browning et al., 2015;  
84 Nassar et al., 2012). The neural mechanism by which this modification of learning rate is achieved is  
85 thought to depend on activity of the central norepinepheric system (Yu & Dayan, 2005), with  
86 increased phasic activity of the system, which may be estimated using pupilometry (Joshi, Li, Kalwani,  
87 & Gold, 2016), reporting the occurrence of more informative events (Browning et al., 2015; Nassar  
88 et al., 2012) and acting to enhance the processing of these events (Aston-Jones & Cohen, 2005).

89 This computational framework provides an overarching logic for when an individual might develop  
90 the negative affective biases which underlie depression; individuals should bias their processing  
91 towards negative events if they estimate that they are more informative than positive events. As  
92 well as providing a novel reformulation of why affective biases may develop, this framework also  
93 suggests a potential novel treatment target; that is, if a higher estimate of the information content  
94 of negative relative to positive events leads to negative affective bias and thus to symptoms of  
95 depression, interventions which redress these estimates this should reduce both negative biases and  
96 symptoms.

97 However, a number of critical questions concerning this account remain outstanding. Firstly, no  
98 previous study has demonstrated that humans maintain separate estimates of the information  
99 content of positive and negative events. We tested whether these estimates were maintained using  
100 a novel learning task (Figure 1) in which participant choice led to both positive and negative  
101 outcomes, with the volatility of the outcomes (and therefore their information content) being  
102 independently manipulated in separate task blocks. Secondly, for estimated information content to  
103 be a viable treatment target it must be malleable. We assessed this malleability by testing whether  
104 the volatility manipulation described above altered participants' estimated information content, as  
105 reflected by the learning rates they used. Lastly, while activity of the central NE system has been  
106 argued to represent estimates of volatility, it is not clear whether or how this system might multiplex  
107 separate representations of the volatility of different classes of event, such as the positive and  
108 negative outcomes examined here. We investigate this using pupillometry as a measure of NE activity  
109 while participants completed the task. We hypothesised that humans maintain separable estimates  
110 of the information content of positive and negative outcomes, that we could measure and  
111 manipulate these estimates using our task and that phasic NE activity yoked to a specific type of  
112 outcome would track the volatility of that outcome.

113

114 **Methods and Materials**

115 **Participants.** 30 English-speaking, individuals aged between 18 and 65 were recruited from the local  
116 community via advertisements. The number of participants recruited for the current cohort was  
117 selected to provide >95% power of detecting a similar effect size as that reported in a previous study  
118 in which a volatility manipulation was used to influence learning rate (Browning et al., 2015).  
119 Potential participants who were currently on a psychotropic medication or who had a history of  
120 neurological disorders were excluded from the study.

121 **General procedure.** The study involved a single experimental session during which participants  
122 completed a novel learning task (described below) as well as standard questionnaire measures of  
123 depression (Quick Inventory of Depressive Symptoms, QIDS (Rush et al., 2003)) and anxiety  
124 (Spielberger State-Trait Anxiety Inventory, trait subscale, STAI (Spielberger, Gorsuch, & Lushene,  
125 1983)) symptoms. The study was approved by the University of Oxford Central Research Ethics  
126 Committee. Written informed consent was obtained from all participants, in accordance with the  
127 Declaration of Helsinki.

128 **The Information Bias Learning Task (IBLT).** The information bias learning task (Figure 1) was adapted  
129 from a structurally similar learning task previously reported in the literature (T. E. J. Behrens et al.,  
130 2007; Browning et al., 2015). On each trial of the task participants were presented with two abstract  
131 shapes (letters selected from the Agathodaimon font) and chose the shape which they believed  
132 would result in the best outcome. On each trial one of the shapes, if chosen, would result in a win of  
133 15p and one would result in a loss of 15p. These two outcomes were independent of each other so  
134 that a particular shape could be associated with one, both or neither of the win and loss outcomes  
135 (Figure 1C). As the two outcomes were independent participants had to separately learn the likely  
136 location of the win and the loss in the current trial. This learning was driven by the outcomes of  
137 previous trials and was used by participants to determine the most advantageous shape to choose  
138 on the current trial. Throughout the task the number and type of stimuli displayed during each

139 phase of the trials was kept constant (Figure 1a) in order to minimise variations in luminance

140 between trials.

141

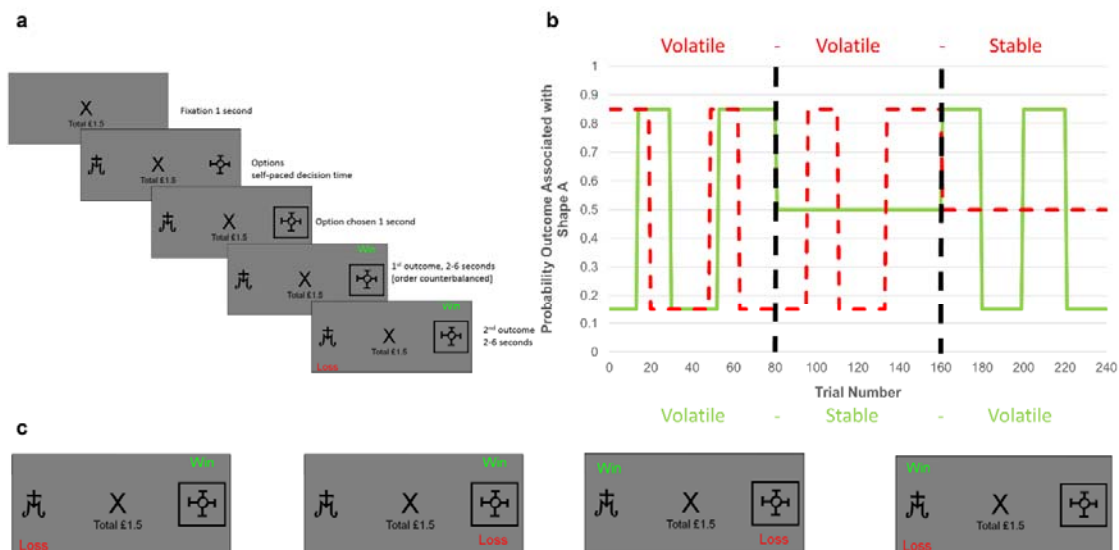

142

143 **Figure 1. Task structure (A) Timeline of one trial from the learning task used in this study.**  
 144 **Participants are presented with two shapes (referred to as shape “A” and “B”) and have to choose**  
 145 **one. On each trial, one of the two shapes will be associated with a “win” outcome (resulting in a**  
 146 **win of 15p) and one with a “loss” outcome (resulting in a loss of 15p). Using trial and error**  
 147 **participants learn where the win and loss are likely to be found and use this information to guide**  
 148 **their choice. (B) Overall task structure. The task consisted of 3 blocks of 80 trials each (i.e. vertical,**  
 149 **dashed, dark lines separate the blocks). The y-axis represents the probability,  $p$ , that an outcome**  
 150 **(win in solid green or loss in dashed red) will be found under shape “A” (the probability that it is**  
 151 **under shape “B” is  $1-p$ ). The blocks differ in how volatile (changeable) the outcome probabilities**  
 152 **are. Within the first block both win and loss outcomes were volatile, in the second two blocks one**  
 153 **outcome was volatile and the other stable (here wins are stable in the second block and losses**  
 154 **stable in the third block). The volatility of the outcome influences how informative that outcome is.**  
 155 **Consider the second block in which the losses are volatile and the wins stable. Here, regardless of**  
 156 **whether the win is found under shape “A” or shape “B” on a trial, it will have the same chance of**  
 157 **being under each shape in the following trials, so the position of a win in this block provides little**  
 158 **information about the outcome of future trials. In contrast, if a loss is found under shape “A”, it is**  
 159 **more likely to occur under this shape in future trials than if it is found under shape “B”. Thus, for**  
 160 **the second block losses provide more information than wins and participants are expected to**  
 161 **learn more from them. (C) The four potential outcomes from a trial. Win and loss outcomes were**  
 162 **independent, that is knowledge of the location of the win provided no information about the**  
 163 **location of the loss. Because of this participants had to separately estimate where the win and**  
 164 **where the loss would be on each trial in order to complete the task. This manipulation made it**  
 165 **possible to independently manipulate the volatility of the two outcomes.**

166 In total, the participants completed three blocks of 80 trials each, with a rest session between blocks.  
167 The same two shapes were used for all trials within a block, with different shapes being used  
168 between blocks. The outcome schedules were determined such that the probability that wins and  
169 losses were associated with shape A within a block always averaged 50%. In the volatile blocks the  
170 association between shape A and the outcome changed from 15 to 85% and back again in runs  
171 ranging from 14 to 30 trials. As described in the introduction, outcomes in the volatile blocks were  
172 more useful when predicting future outcomes, making them “informative”, whereas in the stable  
173 blocks outcome probabilities were fixed at 50%, making the outcomes “uninformative” in terms of  
174 predicting future trials (Figure 1B). In the first block of the task, both outcomes were volatile  
175 (informative), whereas in blocks 2 and 3 only one of the outcomes was volatile (informative) with  
176 the other being stable (uninformative). See supplementary materials for results from a control task  
177 in which volatility was kept constant, while the strength of the association between stimuli and  
178 outcomes (i.e. noise) was varied. The order in which blocks 2 and 3 were completed was  
179 counterbalanced across participants. Participants were paid all the money they had collected in the  
180 task, in addition to a £10 baseline payment. Choice data from the task was analysed by fitting a  
181 behavioural model which is described below. Alternative models are described and assessed in detail  
182 in the supplementary methods.

183 **Behavioural Model Used in Analysis of the IBLT:** The primary measure of interest in the IBLT is the  
184 learning rate for wins and for losses in each of the three blocks. A simple behavioural model, based  
185 on that employed in related tasks (T. E. J. Behrens et al., 2007; Browning et al., 2015) was used to  
186 estimate learning rate. This model first estimated the separate probabilities that the win and loss  
187 would be associated with shape “A” using a Rescorla-Wagner learning rule (Rescorla & Wagner,  
188 1972):

$$rwin_{(i+1)} = rwin_{(i)} + awin * (winout_{(i)} - rwin_{(i)})$$

$$rloss_{(i+1)} = rloss_{(i)} + aloss * (lossout_{(i)} - rloss_{(i)})$$



189 In these equations  $rwin_{(i)}$ , which was initialised at 0.5, is the estimated probability that the win will  
190 be associated with shape “A” on trial  $i$  (NB the probability that the win is associated with shape “B” is  
191  $1-rwin_{(i)}$ ),  $winout_{(i)}$  is a variable coding for whether the win was associated with shape “A” (in  
192 which case the variable has a value of 1) or shape “B” (giving a value of 0) and  $\alpha win$  is a free  
193 parameter, the learning rate for the wins.  $rloss_{(i)}$ ,  $lossout_{(i)}$  and  $\alpha loss$  are the same variables for  
194 the loss outcome. These estimated outcome probabilities were then transformed into a single  
195 choice probability using a soft max function:

$$PchoiceA_{(i)} = \frac{1}{1 + \exp^{-(\beta win * rwin_{(i)} - \beta loss * rloss_{(i)})}}$$

196 Where  $PchoiceA_{(i)}$  is the probability of choosing shape “A” on trial  $i$ , and  $\beta win$  and  $\beta loss$  are  
197 inverse decision temperatures for wins and losses, respectively. The four free-parameters of this  
198 model (learning rates and inverse temperatures for wins and losses) were estimated separately for  
199 each task block and each participant by calculating the full joint posterior probability of the  
200 parameters, given participants’ choices, and then deriving the expected value of each parameter  
201 from their marginalised probability distributions (T. E. J. Behrens et al., 2007; Browning et al., 2015).  
202 Choice data from the first 10 trials of each block was not used when estimating the parameters as  
203 these trials were excluded from the pupil analysis (due to initial pupil adaption) (Browning et al.,  
204 2015; Nassar et al., 2012).

205 **Pupilometry Data.** Full details of the preprocessing of the pupilometry data is provided in the  
206 supplementary methods. Preprocessing resulted in difference timeseries of pupil dilation data which  
207 represented the differential pupil dilation occurring during trials when the outcome (win or loss) was  
208 received relative to when it was not received over the six seconds after presentation of the  
209 outcomes. These timeseries were binned into 1 second bins to facilitate analysis.

210 **Data Analysis.** Parameters derived from the computational models were transformed before  
211 analysis so that they were on the infinite real line (an inverse logit transform was used for learning

212 rates and a log transform for inverse temperatures). Figures illustrate non-transformed parameters  
213 for ease of interpretation. The effect of the volatility manipulation on these transformed parameters  
214 was tested using a repeated measures ANOVA of data derived from the last two task blocks (i.e.  
215 when volatility was manipulated). In this ANOVA block volatility (win volatile block, loss volatile  
216 block) and parameter valence (wins, losses) were within subject factors and block order (win volatile  
217 first, loss volatile first) was a between subject factor. The critical term of this analysis is the block  
218 volatility x parameter valence interaction which tests for a differential effect of the volatility  
219 manipulation on the win and loss parameters.

220 The binned pupil timeseries data was analysed using a repeated measures ANOVA with time bin (1-6  
221 seconds), block volatility (win volatile, loss volatile) and valence (wins, losses) as within subject  
222 factors and block order as a between subject factor. Again a block volatility x valence interaction  
223 tests for a differential effect of the volatility manipulation on the pupil dilation in response to wins vs.  
224 losses. In order to perform between subject correlations of the pupillometry data the mean relative  
225 dilation across the entire six second outcome period was also calculated for each participant and  
226 each block. In all analyses significant interactions were followed up by standard post-hoc tests.

227

228 **Results**

229 Demographic details of the 30 participants are reported in Table 1.

230 **Table 1. Demographic details of participants**

| Measure    | Mean (SD)     |
|------------|---------------|
| Age        | 30.52 (9.51)  |
| Gender     | 76% Female    |
| QIDS-16    | 5.03 (3.95)   |
| Trait-STAI | 35.79 (10.63) |

231

232 **QIDS-16; Quick Inventory of Depressive Symptoms, 16 item self-report version. Trait-STAI;**

233 **Speilberger State-Trait Anxiety Inventory, trait form.**

234

235 *Effect of Volatility Manipulation on Learning Parameters*

236 As predicted, participants' learning rates for positive and negative outcomes reflected the  
237 information content of the outcomes in the IBLT (block volatility x parameter valence;  $F(2,27)$   
238  $=26.488, p < 0.001$ ; Figure 2). Specifically, learning rates were higher for win ( $F(1,27) = 16.59, p$   
239  $< 0.001$ ) and loss ( $F(1,27) = 16.02, p < 0.001$ ) outcomes when they were volatile (informative) than  
240 when they were stable (not informative). Similarly the learning rate for wins was higher than that for  
241 losses when wins were more volatile than losses ( $F(1,27) = 23.958, p < 0.001$ ) and the learning rate for  
242 losses was higher than for wins when losses were more volatile ( $F(1,27) = 6.793, p < 0.015$ ). These  
243 results demonstrate that participants maintain independent estimates of the information content of  
244 positive and negative outcomes and that it is possible to alter these estimates using a simple  
245 volatility manipulation. In contrast to the effects on learning rate there were no significant effects of  
246 the task on the inverse temperature parameter of the learning model ( $F(1,27) = 0.038, p = 0.846$ )  
247 indicating that, as intended, the volatility manipulation specifically altered learning rate rather than  
248 the relative weights placed on positive and negative outcomes (Huys, Pizzagalli, Bogdan, & Dayan,

249 2013). See the Supplementary Materials for additional analysis of the behavioural results as well as  
250 an additional control experiment.  
251

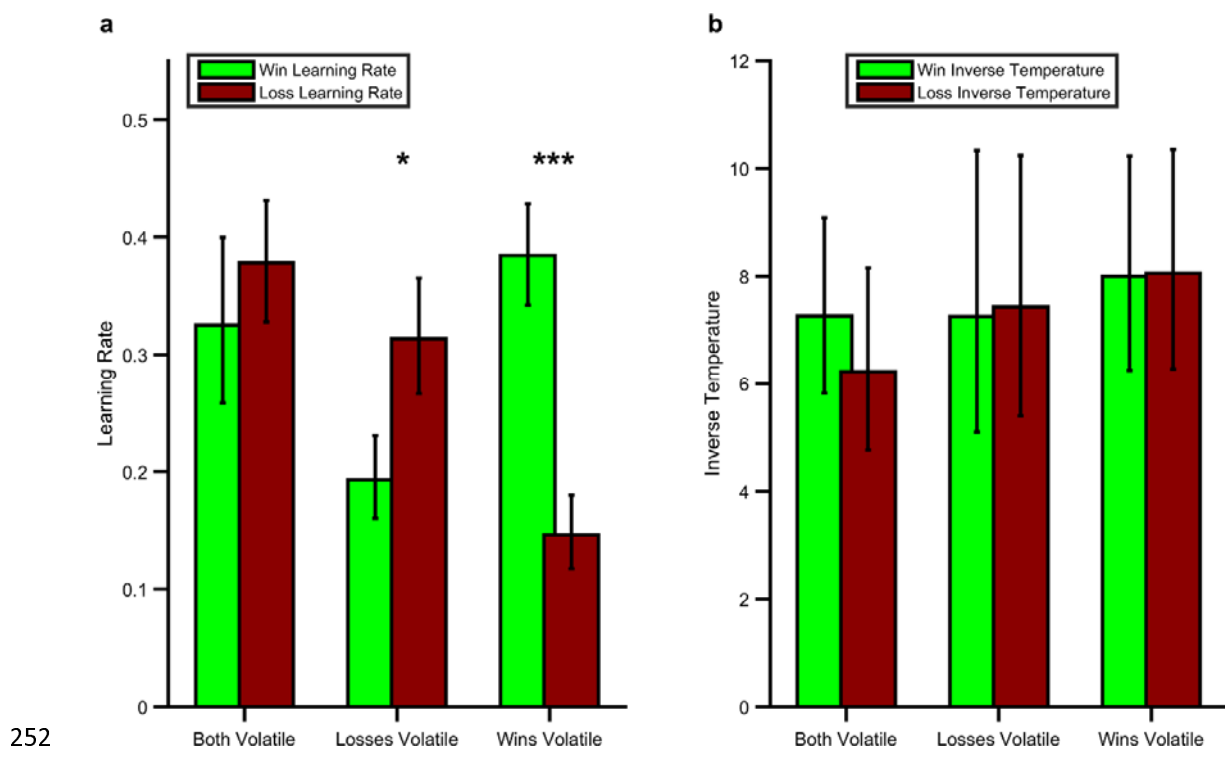

252  
253 **Figure 2. Effect of Volatility Manipulation on Participant Behaviour. (A) Mean (SEM) learning rates**  
254 **for each block of the IBLT. As can be seen the win learning rates (light green bars) and loss learning**  
255 **rate (dark red bars) varied independently as a function of the volatility of the relevant outcome**  
256 **( $F(1,27)=26.488, p<0.001$ ), with a higher learning rate being used when the outcome was volatile**  
257 **than stable (\*  $p<0.05$ , \*\*\*  $p<0.001$  for pairwise comparisons). (B) No effect of volatility was**  
258 **observed for the inverse temperature parameters ( $F(1,27)=0.038, p=0.846$ ).**

259

260 *Effect of Volatility Manipulation on Pupil Dilation*

261 Next, we investigated the extent to which central NE activity, as estimated using pupillometry, was  
262 related to the information content of positive and negative outcomes in the IBLT. Consistent with  
263 the behavioural findings a significant interaction between block volatility and outcome valence was  
264 found for the degree to which participants' pupils dilated in response to outcome receipt (Figure 3;  
265  $F(1,27)=4.9; p=0.04$ ). In other words, participants' pupils dilated more on receipt of an outcome

266 when that outcome was volatile (informative) than when it was stable (not informative). This effect  
267 was not further modified by the time bin following outcome (block volatility x outcome valence x  
268 time;  $F(5,135)=0.340$ ,  $p=0.565$ ). Analysing the positive and negative outcomes separately indicated  
269 that the effect of block volatility was significant for the loss outcomes ( $F(1,27)=7.597$ ,  $p = 0.01$ ), but  
270 not for the win outcomes ( $F(1,27)=0.157$ ,  $p = 0.695$ ).

271

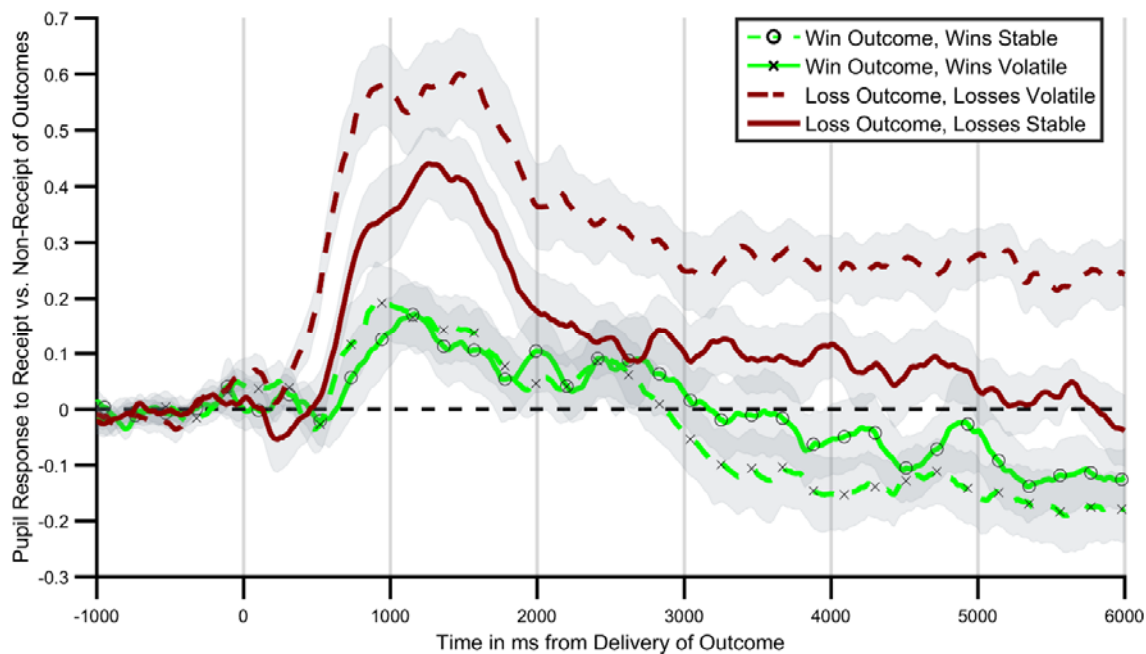

272

273 **Figure 3. Pupil response to outcome delivery during the IBLT. Lines illustrate the mean pupil**  
274 **dilation to the receipt relative to non-receipt of an outcome across the 6 seconds after outcomes**  
275 **are presented. Light green lines (with crosses and circles) report response to win outcomes, dark**  
276 **red lines report response to loss outcomes. Solid lines report blocks in which the wins were more**  
277 **informative (volatile), dashed lines blocks in which losses were more informative. As can be seen**  
278 **pupils dilated more when the relevant outcome was more informative, with this effect being**  
279 **particularly marked for loss outcomes. Shaded regions represent the SEM.**

280

### 281 *Relationship Between Choice Behaviour and Pupil Dilation*

282 As central NE activity is thought to mediate the effect of outcome information content on  
283 participant choice (Yu & Dayan, 2005), there should be a relationship between how much a  
284 participant's pupils differentially dilate in response to an outcome during the informative and non-

285 informative blocks and the degree to which that participant adjusts their learning rate between  
286 blocks for the same outcome. We tested this by assessing the correlation between the change in  
287 mean pupil response between blocks and the change in behaviourally estimated learning rates,  
288 separately for wins and losses. As can be seen (Figure 4) the change in pupil response to loss  
289 outcomes between blocks was significantly correlated with the change in loss learning rate  
290 ( $r(28)=0.5$ ,  $p=0.009$ ) but pupil response to win outcomes was not correlated with change in win  
291 learning rate ( $r(28)=-0.08$ ,  $p=0.7$ ).

292

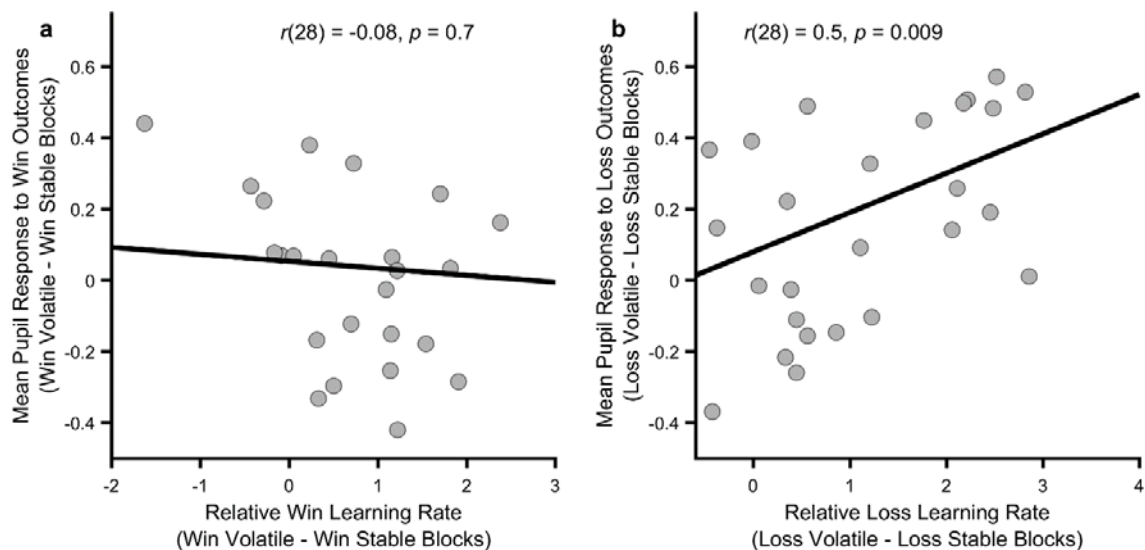

293

294 **Figure 4. Relationship between behavioural and physiological measures. The more an individual**  
295 **altered their loss learning rate between blocks, the more that individual's pupil dilation in**  
296 **response to loss outcomes differed between the blocks (panel b;  $p=0.009$ ), however no such**  
297 **relationship was observed for the win outcomes (panel a;  $p=0.7$ ). Note that learning rates are**  
298 **transformed onto the real line using an inverse logit transform before their difference is calculated**  
299 **and thus the difference score may be greater than  $\pm 1$ .**

300

301 **Discussion**

302 Humans adapt the degree to which they are influenced by positive and negative outcomes in  
303 response to how informative they estimate those outcomes to be. These estimates produce an  
304 affective bias in learning, with a higher learning rate being used for the class of outcome which is  
305 most informative, and are malleable. They may thus represent a novel, computationally defined  
306 cognitive treatment target for depression. A physiological measure of central NE activity was  
307 associated with this process, although this was only seen convincingly for loss outcomes.

308 Previous work has demonstrated that humans adapt their learning in response to subtle statistical  
309 aspects of the environment, such as employing an increased learning rate in volatile, or changeable,  
310 contexts (T. E. J. Behrens et al., 2007; Browning et al., 2015; Nassar et al., 2012). This suggests that  
311 learners maintain an estimate of how useful, or informative, an event is and learn more from events  
312 they estimate to be more informative. The current study extends this work by providing evidence  
313 that humans are able to maintain independent estimates of the information content of different  
314 classes of event, in this case positive and negative outcomes (winning vs. losing money). The parallel  
315 representation of estimated information content of wins and losses provides a mechanism by which  
316 individuals may come to be generally more influenced by events of one class than another. In the  
317 case of depression, patients have been shown to be more influenced by negative events, for  
318 example tending to remember more negative than positive events (Bradley et al., 1995), attend to  
319 negative more than positive events (Gotlib et al., 2004) and learn more from negative and less from  
320 positive outcomes (Eshel & Roiser, 2010). The results of the current study suggest that these  
321 observed negative biases may all be understood as a consequence of patients estimating that the  
322 information content of negative relative to positive events was higher than non-patients. As the  
323 negative biases described above are believed to be causally related to symptoms of depression  
324 (Mathews & MacLeod, 2005), and interventions designed to alter negative biases can reduce  
325 symptoms (Browning et al., 2012; NICE, 2009), these results raise the possibility that novel

326 interventions which target expected information content may act to reduce symptoms of the illness.  
327 Of course, identifying potential targets for treatment and showing that they may be altered  
328 experimentally as done in this paper is only the first step in the development of new treatments. The  
329 next step, analogous to a phase 2a study in drug development (Ciociola et al., 2014), is to assess the  
330 initial efficacy of a potential intervention which engages the target in a clinical population. A study  
331 designed to do this is currently underway using the volatility manipulation described in this paper  
332 (study identifier NCT02913898).

333 In the current study we investigated the link between the learning rate used by participants, which  
334 provides a behavioural index of how informative they estimate an outcome to be, and pupil dilation  
335 which has been shown to correlate with central norepinepheric activity (Joshi et al., 2016) . Pupil  
336 dilation in response to outcome receipt differed as a function of the information content of the  
337 outcome, although this was only significant for losses. Specifically, when losses were informative,  
338 the difference in pupil dilation between trials in which a loss was received and when it was not  
339 received was greater than when the losses were not informative. This result is similar to previously  
340 reported findings of an increased pupil response to outcomes in a volatile context (Browning et al.,  
341 2015; Nassar et al., 2012), although these earlier studies reported a general increase in pupil dilation  
342 rather than a dilation conditioned on receipt of the outcome. A possible explanation of this  
343 difference is that, in the current study, one of the outcomes (win or loss) was always volatile and  
344 presentation order of the outcomes was randomised. Therefore, in contrast to the previous studies  
345 in which only one class of outcome was used, the relevant volatility signal required to perform the  
346 task in the current study was dependent on the outcome presented. In other words, the volatility  
347 signal found in the pupil data from the current study is of the form required for participants to  
348 accurately perform the task. This suggests a degree of flexibility of the pupillary volatility signal, in  
349 that it may reflect the general volatility of a learned association or the volatility of specific  
350 dimensions of more complex associations depending on task demands. It is not clear whether these  
351 general and specific volatility signals are produced by a single or separate neural systems, although it



352 may be possible to address this question using a task in which the total volatility of all task outcomes  
353 is manipulated independently of the volatility of the individual outcomes. The finding that the  
354 volatility signal in the current task modifies pupillary response to outcome receipt may also explain  
355 why the pupilometry measure was sensitive only to loss and not win outcomes; receipt of a loss lead  
356 to a greater pupil dilation overall than a win (see Sup Figure 6) and thus the effect of estimated  
357 outcome information, which modifies the relative dilation observed when an outcome is received,  
358 may be less apparent for wins.

359 The pupilometry measure included in the current study raises the possibility that estimated  
360 information content may be influenced by pharmacological as well as cognitive interventions. Pupil  
361 size is influenced by the activity of a number of central neurotransmitters including norepinephrine  
362 (Joshi et al., 2016) and previous work exploring the neural systems which control response to  
363 volatility have predicted a key role for NE (Yu & Dayan, 2005) suggesting it as an obvious  
364 pharmacological target. A single study has reported an effect of atomoxetine, a norepinephrine  
365 reuptake inhibitor, on learning in a volatile environment (Jepma et al., 2016) although no previous  
366 work has examined the effect of a pharmacological intervention on learning to positive vs. negative  
367 outcomes. It would be interesting to test whether a pharmacological manipulation of norepinepheric  
368 function was able to modify the outcome specific volatility effect demonstrated in this paper as such  
369 an effect may indicate a clinically useful interaction between pharmacological and cognitive  
370 interventions.

371 The information content of an outcome is not solely a function of the volatility of its occurrence.  
372 Other factors, such as the strength of the association between a stimulus, or action, and the  
373 subsequent outcome, sometimes called the “expected uncertainty” (Yu & Dayan, 2005) of the  
374 association, will also influence how informative the outcome is. Outcomes in the IBLT task reported  
375 in this paper vary in terms of both volatility and expected uncertainty, with both of these factors  
376 predicted to influence learning rate in the same direction (i.e. both factors should increase learning

377 rate in the volatile blocks). A control experiment (see supplementary materials) in which volatility  
378 was kept constant but expected uncertainty varied found no effect on learning rate suggesting that  
379 the current findings were likely to be due to the effects of volatility rather than expected uncertainty.  
380 However, it would be interesting in future studies to explore whether it was possible to use  
381 manipulations of expected uncertainty, in the same way that volatility is used in this study, to induce  
382 a preference for positive over negative events. This may provide an alternative approach to engaging  
383 and altering expected information content than the volatility based effect reported here.

384 The current study demonstrates that human learners maintain separable estimates of the  
385 information content of positive and negative outcomes and provides an initial proof of principle as  
386 to how these estimates may be modified. The study illustrates a little explored application of  
387 computational techniques in cognitive neuroscience; they may be used to identify novel treatment  
388 targets and by so doing spur the development of new and more effective treatments.

389

### 390 **Funding and Disclosures**

391 This study was funded by a MRC Clinician Scientist Fellowship awarded to MB (MR/N008103/1). MB  
392 has received travel expenses from Lundbeck for attending conferences. EP declares no potential  
393 conflict of interest.

394

395

396 **References**

- 397 Aston-Jones, G., & Cohen, J. D. (2005). An integrative theory of locus coeruleus-norepinephrine  
398 function: adaptive gain and optimal performance. *Annual Review of Neuroscience*, *28*, 403–  
399 450. <https://doi.org/10.1146/annurev.neuro.28.061604.135709>
- 400 Behrens, T. E., Hunt, L. T., Woolrich, M. W., & Rushworth, M. F. (2008). Associative learning of social  
401 value. *Nature*, *456*(7219), 245–9. <https://doi.org/10.1038/nature07538>
- 402 Behrens, T. E. J., Woolrich, M. W., Walton, M. E., & Rushworth, M. F. S. (2007). Learning the value of  
403 information in an uncertain world. *Nature Neuroscience*, *10*(9), 1214–1221.  
404 <https://doi.org/10.1038/nn1954>
- 405 Bradley, B. P., Mogg, K., & Williams, R. (1995). Implicit and explicit memory for emotion-congruent  
406 information in clinical depression and anxiety. *Behav Res Ther*, *33*(7), 755–770.
- 407 Browning, M., Behrens, T. E., Jocham, G., O'Reilly, J. X., & Bishop, S. J. (2015). Anxious individuals  
408 have difficulty learning the causal statistics of aversive environments. *Nature Neuroscience*,  
409 *18*(4), 590–596. <https://doi.org/10.1038/nn.3961>
- 410 Browning, M., Holmes, E. A., Charles, M., Cowen, P. J., & Harmer, C. J. (2012). Using attentional bias  
411 modification as a cognitive vaccine against depression. *Biological Psychiatry*, *72*(7), 572–579.  
412 <https://doi.org/10.1016/j.biopsych.2012.04.014>
- 413 Ciociola, A. A., Cohen, L. B., Kulkarni, P., Kefalas, C., Buchman, A., Burke, C., ... Vuppalanchi, R. (2014).  
414 How Drugs are Developed and Approved by the FDA: Current Process and Future Directions.  
415 *The American Journal of Gastroenterology*, *109*(5), 620–623.  
416 <https://doi.org/10.1038/ajg.2013.407>
- 417 Eshel, N., & Roiser, J. P. (2010). Reward and punishment processing in depression. *Biological*  
418 *Psychiatry*, *68*(2), 118–124. <https://doi.org/10.1016/j.biopsych.2010.01.027>
- 419 Gotlib, I. H., Krasnoperova, E., Yue, D. N., & Joormann, J. (2004). Attentional biases for negative  
420 interpersonal stimuli in clinical depression. *Journal of Abnormal Psychology*, *113*, 127–135.

- 421 Huys, Q. J., Pizzagalli, D. A., Bogdan, R., & Dayan, P. (2013). Mapping anhedonia onto reinforcement  
422 learning: a behavioural meta-analysis. *Biology of Mood & Anxiety Disorders*, 3(1), 12.  
423 <https://doi.org/10.1186/2045-5380-3-12>
- 424 Jepma, M., Murphy, P. R., Nassar, M. R., Rangel-Gomez, M., Meeter, M., & Nieuwenhuis, S. (2016).  
425 Catecholaminergic Regulation of Learning Rate in a Dynamic Environment. *PLoS*  
426 *Computational Biology*, 12(10), e1005171. <https://doi.org/10.1371/journal.pcbi.1005171>
- 427 Joshi, S., Li, Y., Kalwani, R. M., & Gold, J. I. (2016). Relationships between Pupil Diameter and  
428 Neuronal Activity in the Locus Coeruleus, Colliculi, and Cingulate Cortex. *Neuron*, 89(1), 221–  
429 234. <https://doi.org/10.1016/j.neuron.2015.11.028>
- 430 MacKay, D. J. . (2003). *Information Theory, Inference and Learning Algorithms*. Cambridge:  
431 Cambridge University Press.
- 432 Mathews, A., & MacLeod, C. (2005). Cognitive vulnerability to emotional disorders. *Annual Review of*  
433 *Clinical Psychology*, 1, 167–195. <https://doi.org/10.1146/annurev.clinpsy.1.102803.143916>
- 434 Nassar, M. R., Rumsey, K. M., Wilson, R. C., Parikh, K., Heasley, B., & Gold, J. I. (2012). Rational  
435 regulation of learning dynamics by pupil-linked arousal systems. *Nature Neuroscience*, 15(7),  
436 1040–1046. <https://doi.org/10.1038/nn.3130>
- 437 Nelson, R. E., & Craighead, W. E. (1977). Selective recall of positive and negative feedback, self-  
438 control behaviors, and depression. *Journal of Abnormal Psychology*, 86(4), 379–388.
- 439 NICE. (2009). *Treatment and management of depression in adults, including adults with a chronic*  
440 *physical health problem*. London: NICE.
- 441 Rescorla, R. A., & Wagner, A. R. (1972). A theory of Pavlovian conditioning: Variations in the  
442 effectiveness of reinforcement and nonreinforcement. In A. H. Black & W. F. Prokasy (Eds.),  
443 *Classical Conditioning II: Current research and theory* (pp. 64–99). New York: Appleton-  
444 Century-Crofts.
- 445 Rush, A. J., Trivedi, M. H., Ibrahim, H. M., Carmody, T. J., Arnow, B., Klein, D. N., ... Keller, M. B.  
446 (2003). The 16-Item Quick Inventory of Depressive Symptomatology (QIDS), clinician rating

- 447 (QIDS-C), and self-report (QIDS-SR): a psychometric evaluation in patients with chronic major  
448 depression. *Biological Psychiatry*, 54(5), 573–583.
- 449 Sharot, T., & Garrett, N. (2016). Forming Beliefs: Why Valence Matters. *Trends in Cognitive Sciences*,  
450 20(1), 25–33. <https://doi.org/10.1016/j.tics.2015.11.002>
- 451 Spielberger, C. D., Gorsuch, R. L., & Lushene, R. D. (1983). *Manual for the State-Trait Anxiety*  
452 *Inventory (STAI)*. Palo Alto, CA: Consulting Psychologists Press.
- 453 Sutton, R., & Barto, A. G. (1998). *Reinforcement Learning*. Cambridge, Massachusetts: MIT Press.
- 454 Yu, A. J., & Dayan, P. (2005). Uncertainty, neuromodulation, and attention. *Neuron*, 46(4), 681–92.  
455 <https://doi.org/10.1016/j.neuron.2005.04.026>
- 456

457 **Supplementary Methods**

458 *Further Details of the IBLT*

459 The task was presented on a VGA monitor connected to a laptop computer running Presentation  
460 software version 18.3 (Neurobehavioural Systems). Participants' heads were stabilised using a head-  
461 and-chin rest placed 70 cm from the screen on which an eye tracking system was mounted (Eyelink  
462 1000 Plus; SR Research). The eye tracking device was configured to record the coordinates of both of  
463 the eyes and pupil area at a rate of 500 Hz. The abstract shapes of the learning task were drawn on  
464 either side of a fixation cross which marked the middle of the screen and were offset by around 7°  
465 visual angle. The two outcomes (win and loss) were displayed on the screen in randomised order for  
466 a jittered interval of 2-6 (mean 4) seconds. Auditory stimuli lasting 0.7 seconds were played when  
467 participants received a win ("chi-ching" sound) or loss (error buzz). Participants' accumulated total  
468 winnings was displayed under the fixation cross and was updated based at the beginning of the  
469 subsequent trial.

470 *Preprocessing of Pupil Data*

471 Blinks were identified using the Eyelink system's built in filter and were then removed from the data.  
472 Missing data points (including blinks) were linearly interpolated. The resulting trace was subjected to  
473 a low pass Butterworth filter with a cut-off of 3.75 Hz and then z transformed across the session  
474 (Browning et al., 2015; Nassar et al., 2012). The pupil response to the win and the loss outcomes  
475 were extracted separately from each trial, using a time window based on the presentation of the  
476 outcomes. This included a 1-s baseline period before the presentation of the outcome, and a 6-s  
477 period following outcome presentation. Baseline correction was performed by subtracting the mean  
478 pupil size during the 1 second baseline period prior to the presentation of each outcome, from each  
479 time point in the post outcome period. Individual trials were excluded from the pupilometry analysis  
480 if more than 50% of the data from the outcome period had been interpolated (mean =7% of trials)  
481 (Browning et al., 2015). One participant was excluded from the pupilometry analysis as more than  
482 99% of their trials were excluded on this basis. The first 10 trials from each block were not used in  
483 the analysis as initial pupil adaption can occur in response to luminance changes in this period  
484 (Browning et al., 2015; Nassar et al., 2012). The preprocessing resulted in two sets of timeseries per  
485 participant, one set containing pupil dilation data for each included trial when the win outcomes  
486 were displayed and the other when the loss outcomes were displayed. A difference timeseries,  
487 calculated as the mean pupil response to the receipt vs. non-receipt of the outcome in each block  
488 was then calculated which allowed for assessment of how the volatility of a specific outcome  
489 influenced dilation in response to receiving vs. not receiving that outcome (See below for a

490 complementary regression analysis of this data). In order to statistically compare these timeseries  
491 the mean of each 1 second time bin after outcome presentation was calculated.

#### 492 *Alternative Behavioural Models and Model Selection*

493 The behavioural model used in this study (Referred to as model 1 below) was developed based on  
494 the models used in previous studies in which volatility is manipulated (T. E. Behrens, Hunt, Woolrich,  
495 & Rushworth, 2008; T. E. J. Behrens et al., 2007; Browning et al., 2015) and to allow for the  
496 possibility that differential behaviour in response to win and loss outcomes may have arisen due to  
497 changes in learning rate (captured using separate win and loss learning rates) or outcome sensitivity  
498 (captured using separate inverse temperature parameters). However, it is possible that this model  
499 does not provide the best fit to participant choice data. In order to assess this possibility we  
500 compared the fit of this model against a range of comparator models using the Bayesian Information  
501 Criteria (BIC) metric, which includes a penalty term for model complexity.

502 Model 2: It is possible for participants to perform our task without learning the independent  
503 probability of the win and loss outcomes, but rather by taking a model-free (Daw, Gershman,  
504 Seymour, Dayan, & Dolan, 2011) approach in which the overall value of each shape was learned.

$$505 \quad v^A_{(i+1)} = v^A_{(i)} + \alpha value * (out_{(i)} - v^A_{(i)})$$

506 Here the value of shape A ( $v^A$ ) initiates at 0 on trial 1, and is updated on every trial based on the joint  
507 outcome (i.e. the win – loss for that shape) of the trial ( $out_{(i)}$ ), which can be -1, 0 or 1 with a single  
508 learning rate ( $\alpha value$ ). The estimated relative values of the 2 shapes were then transformed into a  
509 choice probability using a softmax function with a single inverse temperature parameter.

510 Model 3: An alternative approach, described by Behrens and colleagues (T. E. J. Behrens et al., 2007)  
511 estimates trialwise volatility within a fully Bayesian framework. For this model we used Behrens'  
512 Bayesian learner to independently estimate the expected probabilities of the win and loss outcomes  
513 during the task (note that there are no free parameters for this learner). These estimates were then  
514 combined using the same selector model described in the main text with two inverse temperature  
515 parameters.

516 Model 4: This was a slightly simpler version of Model 1 in that it employed only a single inverse  
517 temperature parameter allowing assessment of the degree to which using 2 such parameters  
518 influenced model fit.

519 Model 5: Finally, we tested a slightly more complex version of Model 4 by including a risk parameter  
520  $\gamma$ , as used in previous studies, which modulates the estimated probabilities of wins and losses in a

521 non-linear way. Risk parameters have been shown to account for non-normative aspects of human  
 522 choice, particularly when outcome probabilities are particularly high or low:

523 
$$rw\tilde{in}_{(i)} = 2^{-(-\log_2(rwin_{(i)}))^{\gamma}}$$
  

$$rl\tilde{oss}_{(i)} = 2^{-(-\log_2(rloss_{(i)}))^{\gamma}}$$

524

525 A summary of the five models can be found in Supplementary Table 1 below:

526

527 **Table S1: Description of Comparator Models**

| Model Name | Number of Learning Rate Parameters | Number of Inverse Temperature Parameters | Notes                            |
|------------|------------------------------------|------------------------------------------|----------------------------------|
| 1.         | 2                                  | 2                                        | Model used in paper              |
| 2.         | 1                                  | 1                                        | Model-free learner               |
| 3.         | 0                                  | 2                                        | Bayesian learner                 |
| 4.         | 2                                  | 1                                        | Single inverse temperature model |
| 5.         | 2                                  | 1                                        | Additional risk parameter        |

528

529 All models were fitted to participant data using the same procedure described in the main paper. BIC  
 530 scores for each model are illustrated in figure S1 below (note that lower scores indicate a better fit).  
 531 As can be seen the model reported in the main paper (Model 1) fits the data best. The single inverse  
 532 temperature model (Model 4) performs almost as well, with the other models performing less well.



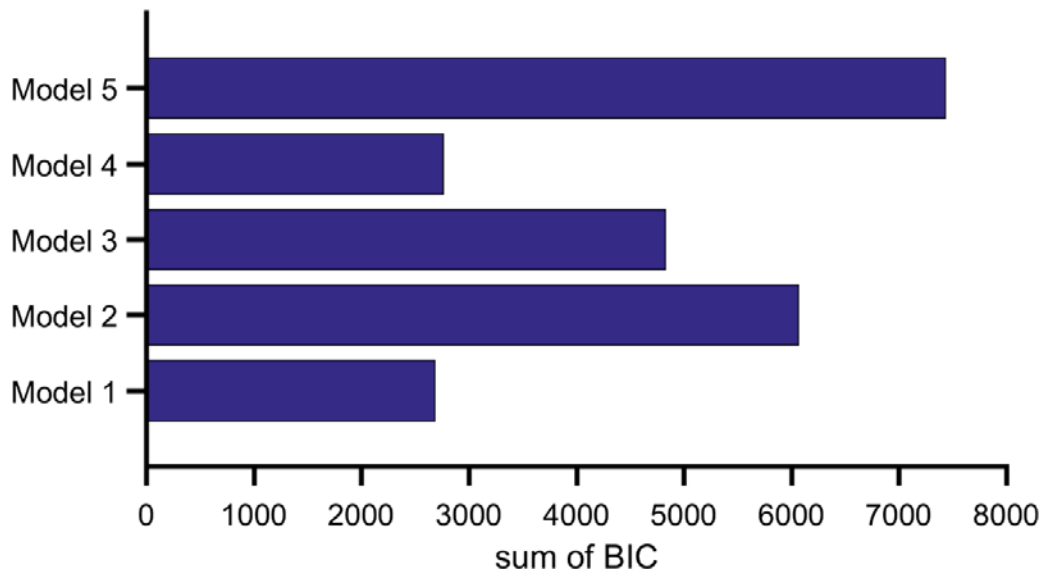

533

534 **Supplementary Figure S1: BIC Scores for Comparator Models (see table S1 for model descriptions).**

535 **Smaller BIC scores indicate a better model fit.**

536

### 537 **Supplementary Results**

#### 538 *Switch-Stay Analysis of Behaviour*

539 The IBLT includes both positive and negative outcomes which are independent of each other. As a  
540 result the task contains trials in which both positive and negative outcome encourage the same  
541 behaviour in future trials (e.g. when the win is associated with shape A and the loss with shape B,  
542 both outcomes encourage selection of shape A in the following trial) as well as trials in which the  
543 positive and negative outcomes act in opposition (e.g. when both outcomes are associated with  
544 shape A, then the win outcome encourages selection of shape A in the next trial and the loss  
545 outcome encourages selection of shape B). This second type of trial provides a simple and sensitive  
546 means of assessing how the volatility manipulations alters the impact of win and loss outcomes on  
547 choice behaviour in the task blocks. Specifically an increased influence of win outcomes (e.g. when  
548 wins are volatile) should lead to:

- 549 a. A decreased tendency to change (shift) choice when both win and loss outcomes are  
550 associated with the chosen shape in the current trial
- 551 b. An increased tendency to change (shift) choice when both win and loss outcomes are  
552 associated with the unchosen shape in the current trial.

553 This analysis does not depend on any formal model and thus can be used to complement the model  
554 based analysis reported in the main paper. We calculated the proportion of shift trials separately for  
555 trials in which both outcomes were associated with the chosen or unchosen shape for each of the  
556 three blocks. Consistent with the model based analysis, participants switched significantly less  
557 frequently when both outcomes were associated with the chosen option in the win relative to loss  
558 informative blocks (Figure S2;  $F(1,27)=6.193$ ,  $p=0.019$ ) and switched significantly more frequently  
559 when both outcomes were associated with the unchosen option in the win relative to loss  
560 informative blocks (Figure S2;  $F(1,27)=4.353$ ,  $p=0.047$ ). This indicates that the results reported in the  
561 main paper are unlikely to be dependent on the exact form of the behavioural model used to derive  
562 the learning rate parameter.

563

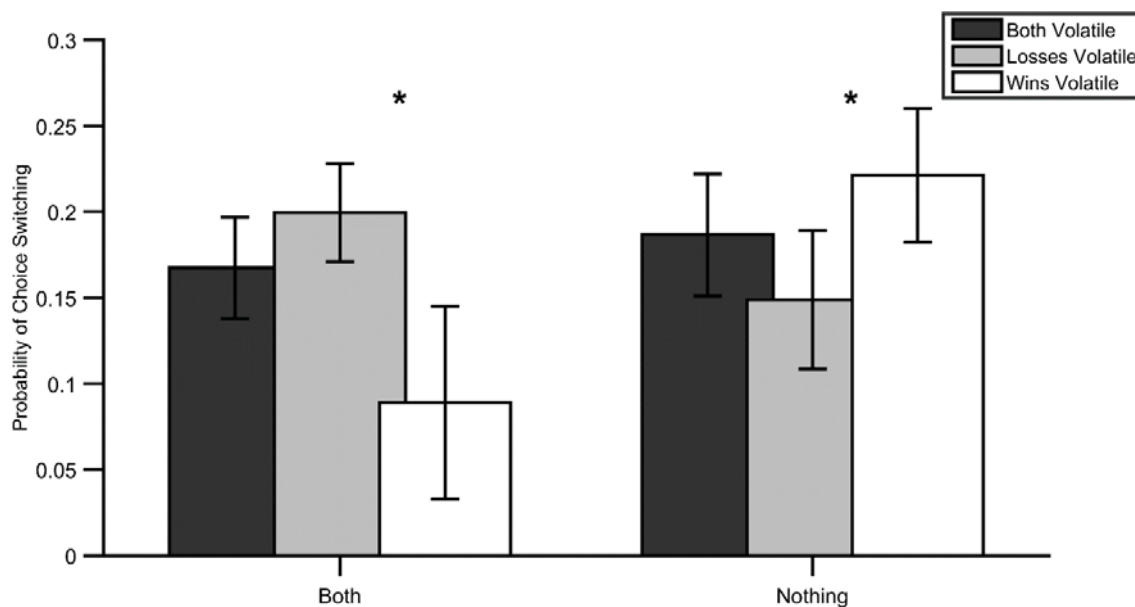

564

565 **Supplementary Figure S2: Analysis of switching behaviour in the IBLT task. The mean (SEM)**  
566 **probability of switching choice in the subsequent trial is plotted separately for trials in which both**  
567 **win and loss outcome are associated with the chosen option (“both”) and the non-chosen option**  
568 **(“nothing”). The columns represent the probability of switching in the first block of the task when**  
569 **both outcomes were informative/volatile (dark columns), in the block in which losses were more**  
570 **informative (grey columns) and the block in which wins were more informative (white column). As**  
571 **can be seen, when wins are more informative than losses (i.e. white bars), participant choice is**  
572 **more influenced by the win relative to loss outcomes than when losses are more informative (grey**  
573 **bars). Specifically, participants are more likely to stick with a choice which has just resulted in both**  
574 **a win and a loss and are more likely to switch to a choice if they didn’t choose it when the wins are**  
575 **informative.  $*=p<0.05$  for comparison between win informative and loss informative blocks.**

576

577

578 *Expected vs Unexpected Uncertainty*

579 When learning, a number of different forms of uncertainty can influence behaviour. One form, which  
580 is sometimes called “unexpected uncertainty” (Yu & Dayan, 2005) is caused by changes in the  
581 associations being learned (i.e. volatility) and is the main focus of this paper (see main text for a  
582 description of how volatility influences learning). A second form of uncertainty, sometimes called  
583 “expected uncertainty”(Yu & Dayan, 2005) arises when an association between a stimulus or action  
584 and the subsequent outcome is more or less predictive. For example, this form of uncertainty is  
585 lower if an outcome occurs on 90% of the times an action is taken and higher if the outcome occurs  
586 on 50% of the time an action is taken. Normatively, expected uncertainty should influence learning  
587 rate—a less predictive association (i.e. higher expected uncertainty) leads to more random  
588 outcomes which tell us less about the underlying association we are trying to learn, so learners  
589 should employ a lower learning rate when expected uncertainty is higher. In the task described in  
590 this paper both the expected and unexpected uncertainty differ between blocks. Specifically, when  
591 an outcome is stable in the task it occurs on 50% of trials, whereas when it is volatile it varies  
592 between occurring on 85/15% of trials. Thus the stable outcome is, at any one time, also less  
593 predictable (i.e. noisier) than the volatile outcome. This task schedule was used as a probability of  
594 50% for the stable outcome improves the ability of the task to accurately estimate learning rates (it  
595 allows more frequent switches in choice). Further both forms of uncertainty would be expected to  
596 reduce learning rate in the stable blocks and increase it in the volatile block of the task. However,  
597 this aspect of the task raises the possibility that the observed effects on behaviour described in the  
598 main paper may arise secondary to differences in expected uncertainty (noise) rather than the  
599 unexpected uncertainty (volatility) manipulation. In order to test this possibility we developed a  
600 similar learning task in which volatility was kept constant and expected uncertainty was varied  
601 (Figure S4). In this task, participants again had to choose between two shapes in order to win as  
602 much money as possible, however on each trial 100 “win points” and 100 “loss points” were divided  
603 between the two shapes and participants received money proportional to the number of win points  
604 – loss points of their chosen option. Thus, a win and loss outcome occurred on every trial of this task,  
605 but the magnitude of these outcomes varied. During the task, participants had to learn the expected  
606 magnitude of wins and losses for the shapes rather than the probability of their occurrence. This  
607 design (Figure S4a) allowed us present participants with schedules in which the volatility (i.e.  
608 unexpected uncertainty) of win and loss magnitudes was constant but the noise (expected  
609 uncertainty) varied (Figure S4b). Otherwise the task was structurally identical to the IBLT with 240  
610 trials split into 3 blocks. We recruited a separate cohort of 30 healthy participants who completed  
611 this task and then estimated their learning rate using a model which was structurally identical (i.e. 2

612 learning rates and 2 inverse temperature parameters) to that used in the main paper (Model 1). As  
613 can be seen (Figure S4c), there was no effect of expected uncertainty on participant learning rate  
614 (block information x parameter valence;  $F(1,28)=1.97$ ,  $p=0.17$ ) during this task. This suggests that  
615 the learning rate effect seen in the IBLT cannot be accounted for by differences in expected  
616 uncertainty and therefore is likely to have arisen due to the unexpected uncertainty (volatility)  
617 manipulation. Inverse decision temperature did differ between block ( $F(1,28)=5.56$ ,  $p=0.026$ ). As can  
618 be seen in Figure S4d, there was a significantly higher win inverse temperature during the block in  
619 which the losses had lower noise ( $F(1,28)=9.26$ ,  $p=0.005$ ) and when compared to the win inverse  
620 temperature when wins had lower noise ( $F(1,28)=5.35$ ,  $p=0.028$ ), but no equivalent effect for loss  
621 inverse temperature. These results suggest that, if anything, participants were more influenced by  
622 noisy outcomes.

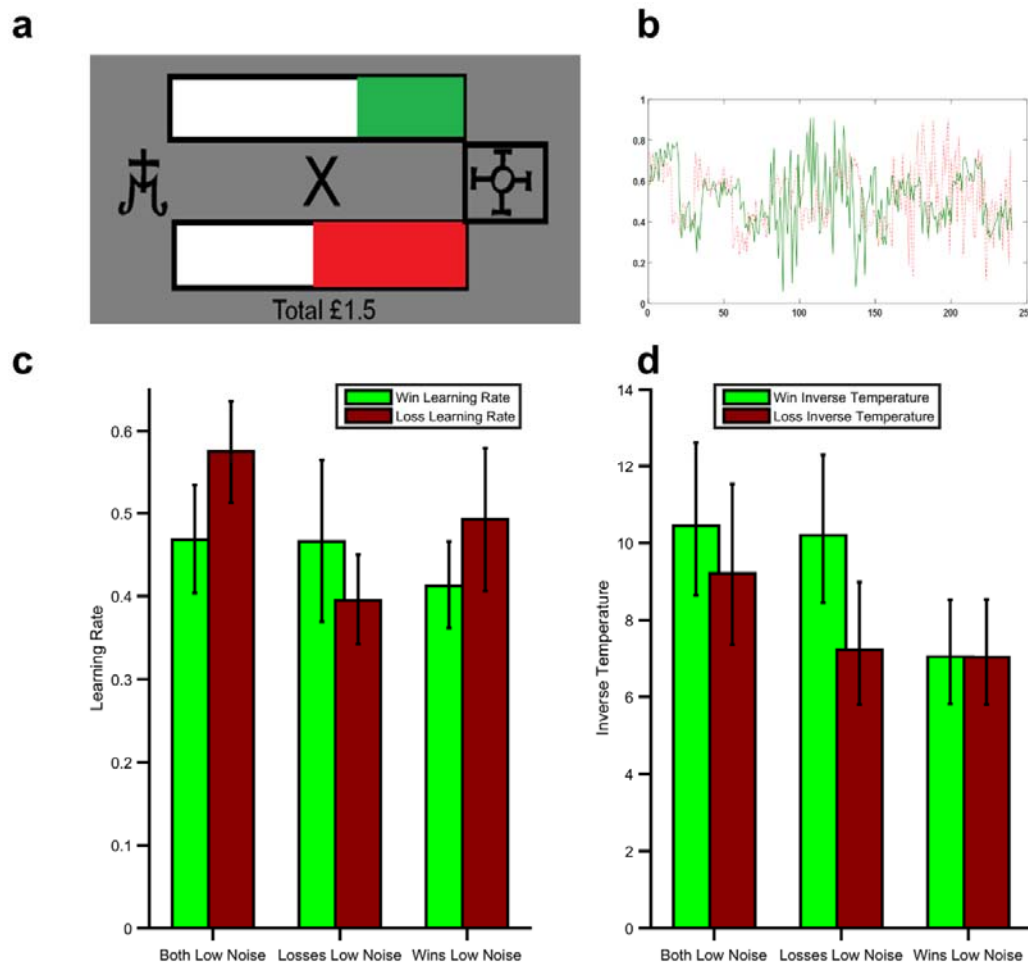

623

624 **Figure S4: Magnitude Task. A) example outcome screen from the task. Participants chose between**  
625 **two shapes. Each shape, if chosen, resulted in winning a proportion of 100 win points (bar on top**  
626 **of fixation cross with green fill) and losing a proportion of 100 loss points (bar under fixation**

627 **cross with red fill), with participants receiving the difference between the two. B) The task schedule**  
628 **for win (green) and loss (red) magnitudes included 3 blocks; in the first block both outcomes had**  
629 **low expected uncertainty (noise), in the last two blocks one outcome had high and the other low**  
630 **expected uncertainty. The volatility of the outcomes was constant across blocks. C) Participants**  
631 **did not significantly adjust their learning rates in response to expected uncertainty and D) inverse**  
632 **temperature for wins was increased during the block in which the losses had lower noise, with no**  
633 **effect on loss inverse temperature.**

634

#### 635 *Regression Analysis of Pupil Data*

636 The analysis of pupil data reported in the main text examines the effect of block information content  
637 (i.e. win volatile vs. loss volatile) and outcome receipt on the pupil response to win and loss  
638 outcomes. However a number of other factors may also influence pupil dilation such as the order in  
639 which the outcomes were presented and the surprise associated with the outcome (Browning et al.,  
640 2015). In order to ensure that these additional factors could not account for our findings we ran a  
641 regression analysis of the pupil data from the IBLT task. In this analysis we derived, for each  
642 participant, trialwise estimates of the outcome volatility and outcome surprise of the chosen option  
643 using the Ideal Bayesian Observer reported by Behrens et al. (T. E. J. Behrens et al., 2007). These  
644 estimates were entered as explanatory variables alongside variables coding for outcome order (i.e.  
645 win displayed first or second), outcome of the trial (outcome received or not) and an additional term  
646 coding for the interaction between the outcome volatility and outcome of the trial (i.e. analogous to  
647 the pupil effect reported in Figure 3 of the main paper). Separate regression analyses were run for  
648 each 2ms timepoint across the outcome period, for win and loss outcomes and for each participant.  
649 This resulted in timeseries of beta weights representing the impact of each explanatory factor, for  
650 each participant and for win and loss outcomes. As can be seen in Figure S5 below, consistent with  
651 the results reported in the paper this analysis revealed a significant volatility x outcome interaction  
652 for loss outcomes ( $F(1,27)=6.249$ ,  $p = 0.019$ ), with no effect for wins ( $F(1,27)=0.215$ ,  $p = 0.646$ ). This  
653 result indicates that pupil effects reported in the main paper are not the result of outcome order or  
654 surprise effects on pupil dilation.

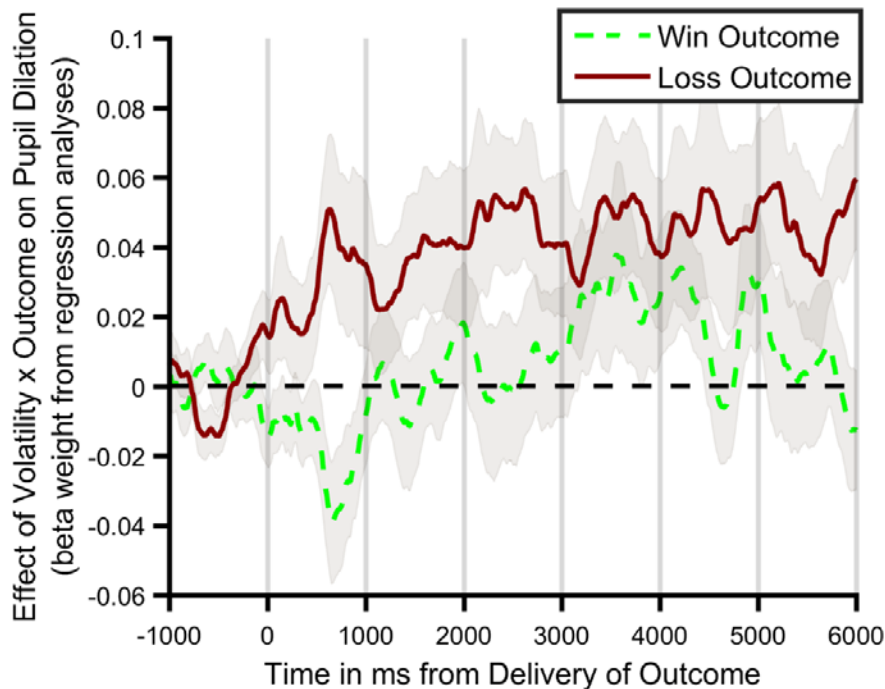

655

656 **Supplementary Figure S5. Regression analysis of pupil data. The mean (SEM) beta weight of the**  
657 **volatility x outcome regressor of the regression analysis of the pupil data is shown separately for**  
658 **win (green) and loss (red) outcomes. The loss regressor differs significantly from 0 for the loss**  
659 **outcomes indicating that, across participants, pupil dilation was greater in response to an**  
660 **outcome in the volatile than stable block for losses. No significant effect was observed for win**  
661 **outcomes.**

662

### 663 *Post-Hoc Analysis of Pupil Data*

664 Figure 3 from the paper illustrates the difference in pupil dilation between trials in which an  
665 outcome was received and those in which the outcome was not received. In order to further  
666 investigate this effect Figure S6 below separately plots the mean pupil response for trials in which  
667 the outcome was and was not received. As can be seen, whereas there is relatively little difference in  
668 pupil response during the win trials, there is a large difference in dilation between trials on which a  
669 loss is received and those in which no loss is received. Further, the effect of loss volatility is seen to  
670 both increase dilation on receipt of a loss and reduce dilation when no loss is received, suggesting  
671 that the effect of the volatility manipulation is to exaggerate the effect of the outcome.

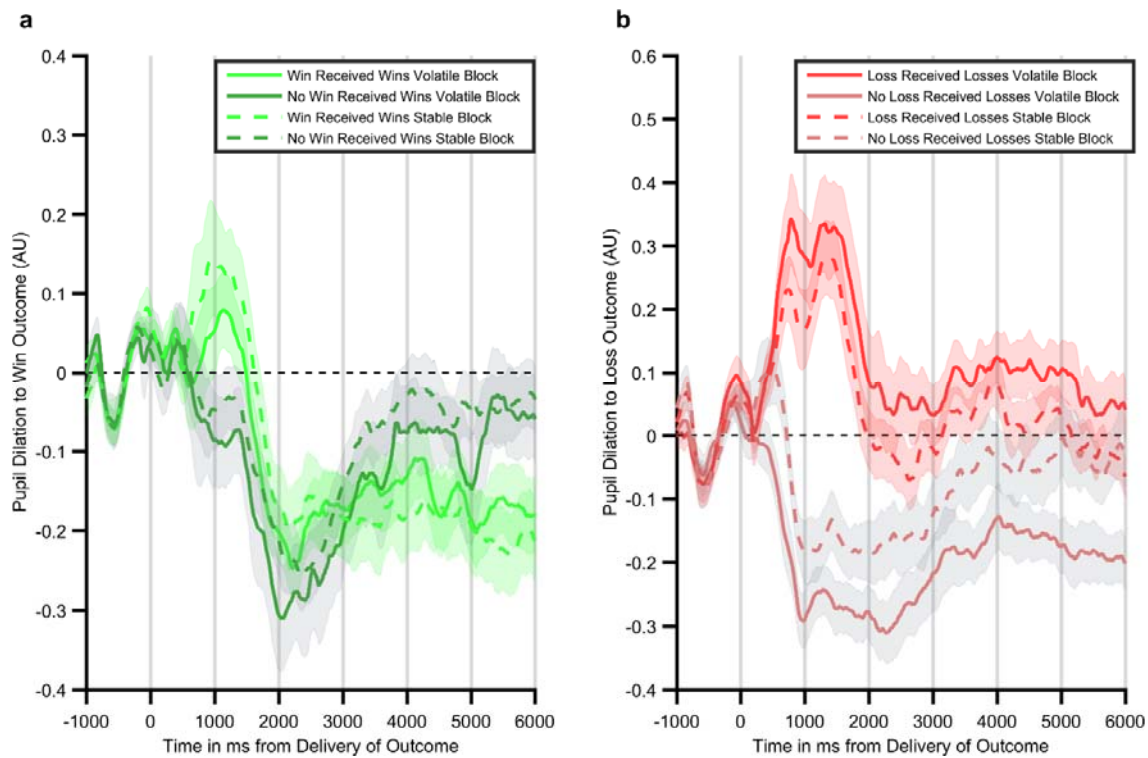

672

673 **Supplementary Figure S6. Individual time courses for trials in which wins (panel a) and losses**  
674 **(panel b) are either received or not received. Lines represent the mean and shaded areas the SEM**  
675 **of pupil dilation over the 6 seconds after outcomes are presented.**

676

677 *Relationship Between Baseline Symptoms of Anxiety and Depression and Task Outcomes*

678 Although participants in the current study were not selected on the basis of their symptoms of  
679 depression or anxiety, baseline questionnaires were completed allowing assessment of the  
680 relationship between symptoms and task performance. Consistent with previous work (Browning et  
681 al., 2015) symptoms of anxiety, measured using the trait-STAI and depression, measured using the  
682 QIDS, correlated significantly negatively with differential pupil response to losses (all  $r < -0.43$ , all  
683  $p < 0.02$ ). That is, the higher the symptom score, the less pupil dilation differed between the loss  
684 informative and loss non-informative blocks. These measures did not correlate with pupil response  
685 to wins (all  $p > 0.2$ ). A marginal correlation was found between trait-STAI and the change in learning  
686 rate to losses, with participants with higher scores adjusting their learning rate less than those with a  
687 lower score ( $r = -0.34$ ,  $p = 0.07$ ). We did not observe any relationship between either questionnaire  
688 measure and change in the win learning rate or between QIDS score and change in loss learning rate  
689 (all  $p > 0.2$ ).

690

691 **Supplementary References**

692 Daw, N. D., Gershman, S. J., Seymour, B., Dayan, P., & Dolan, R. J. (2011). Model-based influences on

693 humans' choices and striatal prediction errors. *Neuron*, 69(6), 1204–1215.

694 <https://doi.org/10.1016/j.neuron.2011.02.027>

695

696

697
